# Supplementary material for: Soft gold nanowire sponges for strain-insensitive conductors, wearable energy storage and catalytic converters
Source: Royal Society of Chemistry journal article supplement (doi:10.1039/d1tc04080d), 2021-01-01
Supplement: d1tc04080d1.pdf [file d1tc04080d1.pdf]

## **Soft Gold Nanowire Sponges for Strain-insensitive Conductors, Wearable Energy Storage and Catalytic Converters**

*Fenge Lin<sup>a,b</sup>, Kaixuan Wang<sup>a,b</sup>, Tiance An<sup>a,b</sup>, Bowen Zhu<sup>a,b</sup>, Yunzhi Ling<sup>a,b</sup>, Shu Gong<sup>a,b</sup>,  
Siyuan Liu<sup>a,b</sup> and Wenlong Cheng<sup>a,b,\*</sup>*

*<sup>a</sup> Department of Chemical Engineering, Monash University, Clayton, 3800 Victoria, Australia*

*<sup>b</sup> The Melbourne Centre for Nanofabrication, Clayton, 3168 Victoria, Australia*

*\*Corresponding author: [Wenlong.Cheng@monash.edu](mailto:Wenlong.Cheng@monash.edu)*

## **Supporting Notes**

### *1. Calculation of the specific capacitance of v-AuNWs sponge based supercapacitors*

The volumetric specific capacitances ( $C_v$ ) were calculated based on a cyclic voltammetry curve as following:

$$C_v = \frac{\int i dV}{2\nu\Delta Vv} \quad (1)$$

where  $\nu$  is the scan rate (unit is  $\text{mV s}^{-1}$ ),  $\Delta V$  is the potential window (0.8 V),  $v$  is the volume of v-AuNWs sponge based supercapacitor (unit is  $\text{cm}^3$ ).

| Materials                                         | compressibility | bending | Stretchability | stability         | ref         |
|---------------------------------------------------|-----------------|---------|----------------|-------------------|-------------|
| PANI/SWCNT<br>sponge                              | 60%             | N/A     | N/A            | 92% (1000 cycles) | 1           |
| Co(OH)F/<br>PEDOT:PSS/AgNW<br>sponge              | N/A             | 120°    | N/A            | 86% (3000 cycles) | 2           |
| CNT/PDMS sponge                                   | 50%             | N/A     | N/A            | 98% (3000 cycles) | 3           |
| NiCo <sub>2</sub> S <sub>4</sub> carbon<br>sponge | 60%             | N/A     | N/A            | 90% (3000 cycles) | 4           |
| nitrogen (N)-doped<br>carbon foams                | 60%             | N/A     | N/A            | 96% (4000 cycles) | 5           |
| CNT<br>sponge/PPy/MnO <sub>2</sub>                | 50%             | N/A     | N/A            | 90% (1000 cycles) | 6           |
| v-AuNWs/PANI<br>sponge                            | 50%             | 180°    | 66%            | 93% (1000 cycles) | Our<br>work |

**Table S1.** Summary of sponge-based flexible supercapacitors reported in literature.

A

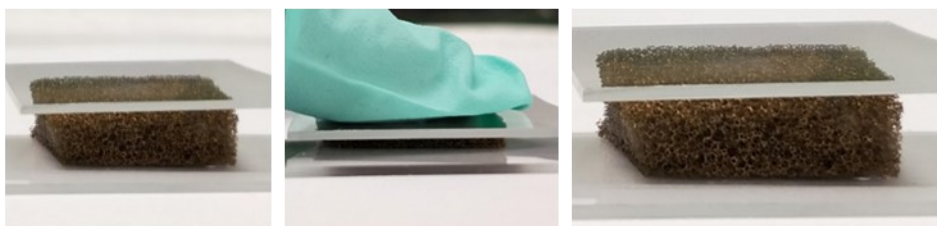

B

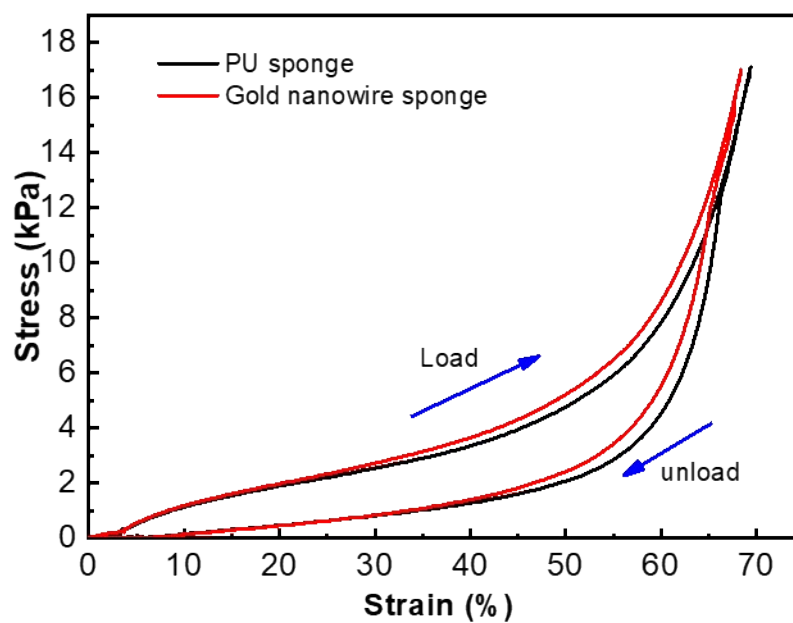

**Figure S1.** (A) Photographs of compressible v-AuNWs sponge. (B) Compressible stress–strain curves for sponge and v-AuNWs sponge.

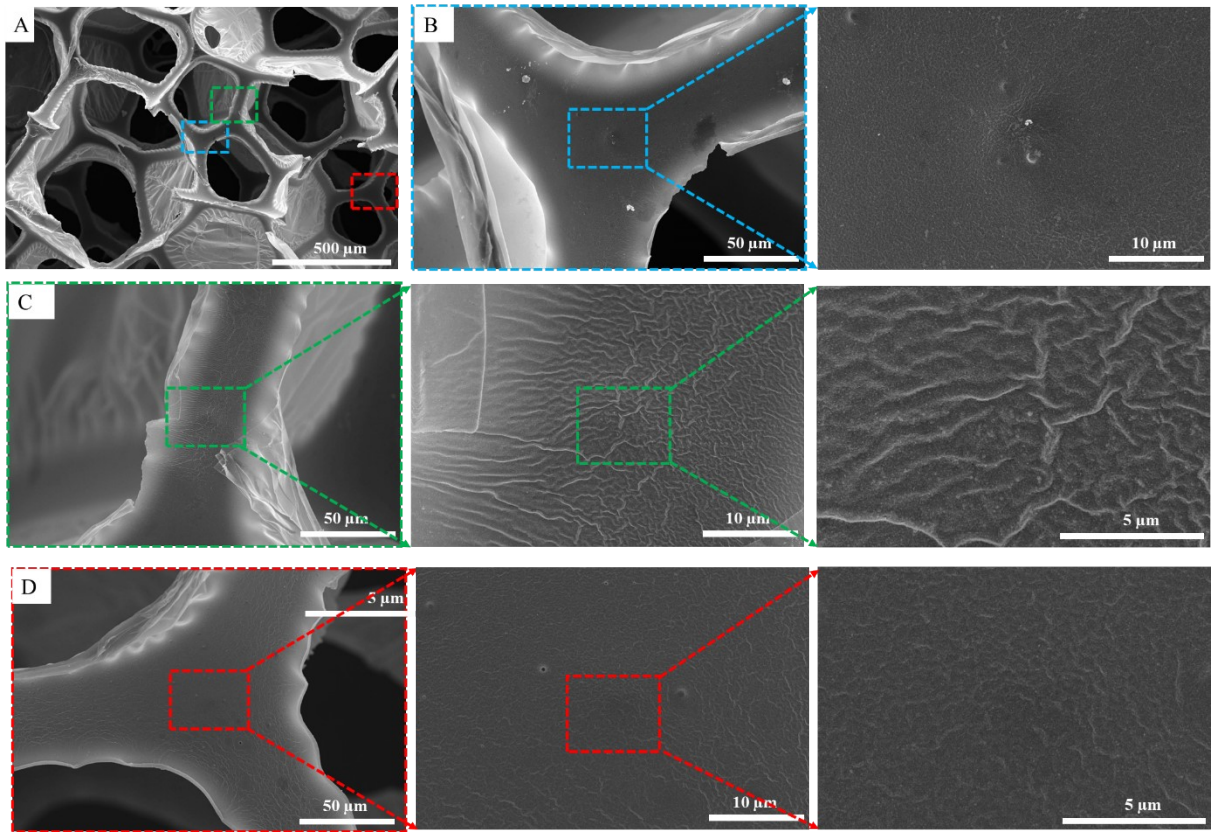

**Figure S2.** (A) SEM image of v-AuNWs sponge without any Ecoflex embedment and external deformations; we chose three areas, marked in color dashed rectangles, zoom in and find out details in (B), (C) and (D).

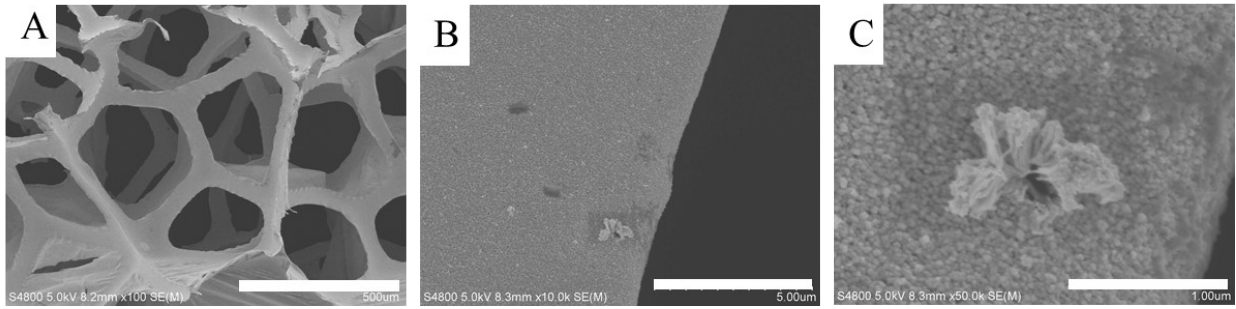

**Figure S3.** SEM image of v-AuNWs sponge without any Ecoflex embedment and external deformations under different magnifications, the scale bar is 500 μm (A), 5 μm (B) and 500 nm (C) respectively.

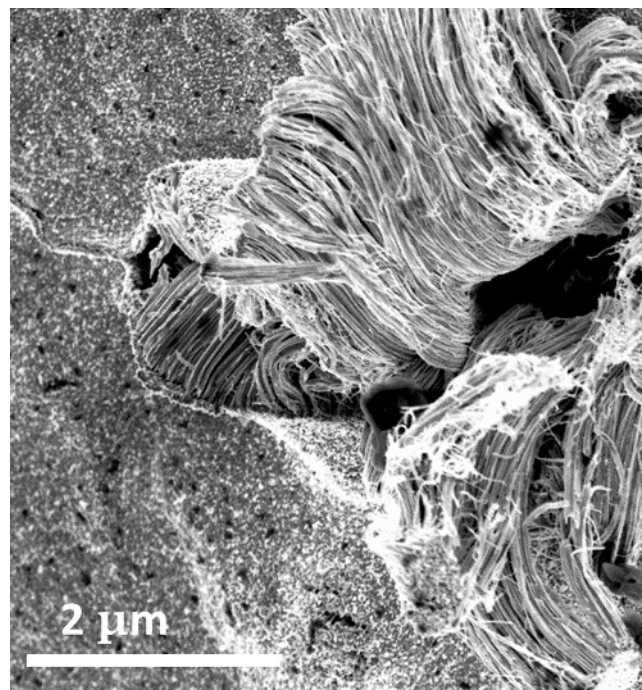

**Figure S4.** SEM image of v-AuNWs on sponge skeleton with a nanowire length of  $\sim 2 \mu\text{m}$ . Scale bar is  $2 \mu\text{m}$ . This particular v-AuNWs sponge was fabricated by immersing Au seed modified sponge into the growth solution of ethanol/water ( $v/v = 1:1.2$ ), including HAuCl<sub>4</sub> (12 mM), ligand MBA (1.1 mM), and L-AA (30 mM) for 15 minutes.

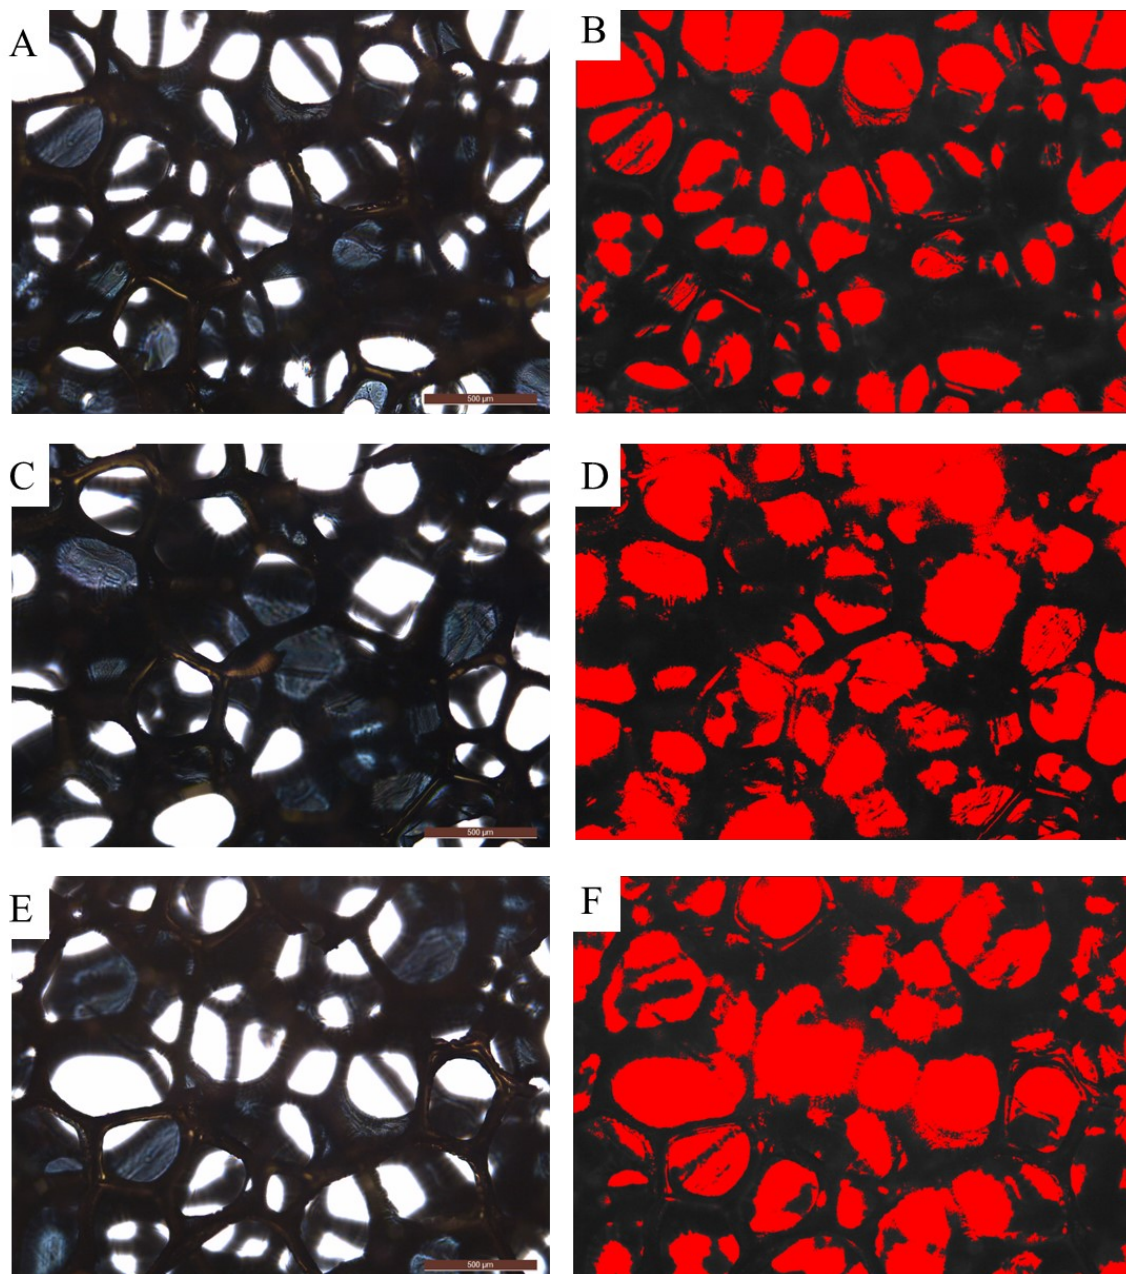

**Figure S5.** (A, C, E) Optical images of v-AuNWs sponge without Ecoflex embedment (the size is 1 cm × 1 cm × 0.5 cm). (B, D, F) Particles analysis of (A), (C), (E), respectively. The unoccupied spaces are dyed with red color by the software image J.

The three random cross-sectional images were taken in order to estimate the porosity. The raw optical images were undertaken particle analysis with the software (Image J). The parts in black are the v-AuNWs sponge skeletons; the unoccupied parts in red are the porous cross-sectional area. The estimated porosity of v-AuNWs sponge was  $50.3 \pm 2.4\%$ .



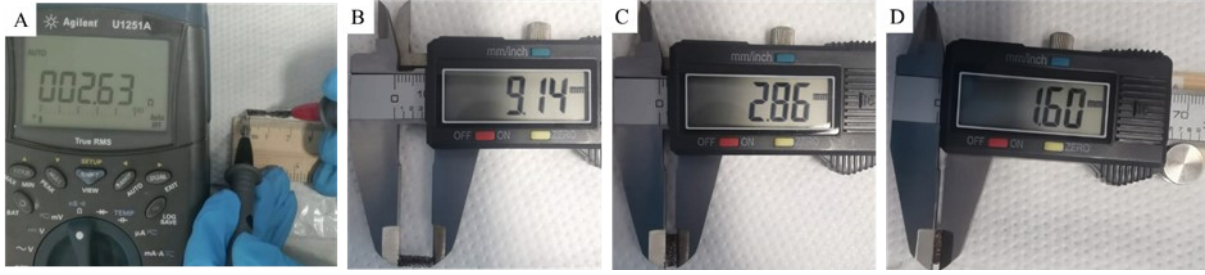

**Figure S6.** (A) The resistance of v-AuNWs sponge. (B) The length of this v-AuNWs sponge. (C) The width of this v-AuNWs sponge. (D) The thickness of this v-AuNWs sponge.

Calculation the conductivity of v-AuNWs sponge

The conductivity of v-AuNWs sponge was calculated as follow:

$$\rho = R \frac{A}{L} \quad (3)$$

$$\sigma = \frac{1}{\rho} = \frac{L}{RA} \quad (4)$$

where  $\sigma$  is conductivity (unit is  $S m^{-1}$ ),  $\rho$  is the resistivity (unit is  $\Omega.m$ ),  $R$  is the electrical resistance (unit is  $\Omega$ ),  $L$  is the length (unit is  $m$ ),  $A$  is the cross-section area (unit is  $m^2$ ) of the sample. This gives the estimation of apparent conductivity. If the porous area in the cross-section area was excluded, the effective area occupied by skeleton should be considered. Then the effective conductivity should be

$$\sigma = \frac{L}{RA(1 - \varepsilon)} \quad (5)$$

where  $\varepsilon$  is cross-sectional porosity.

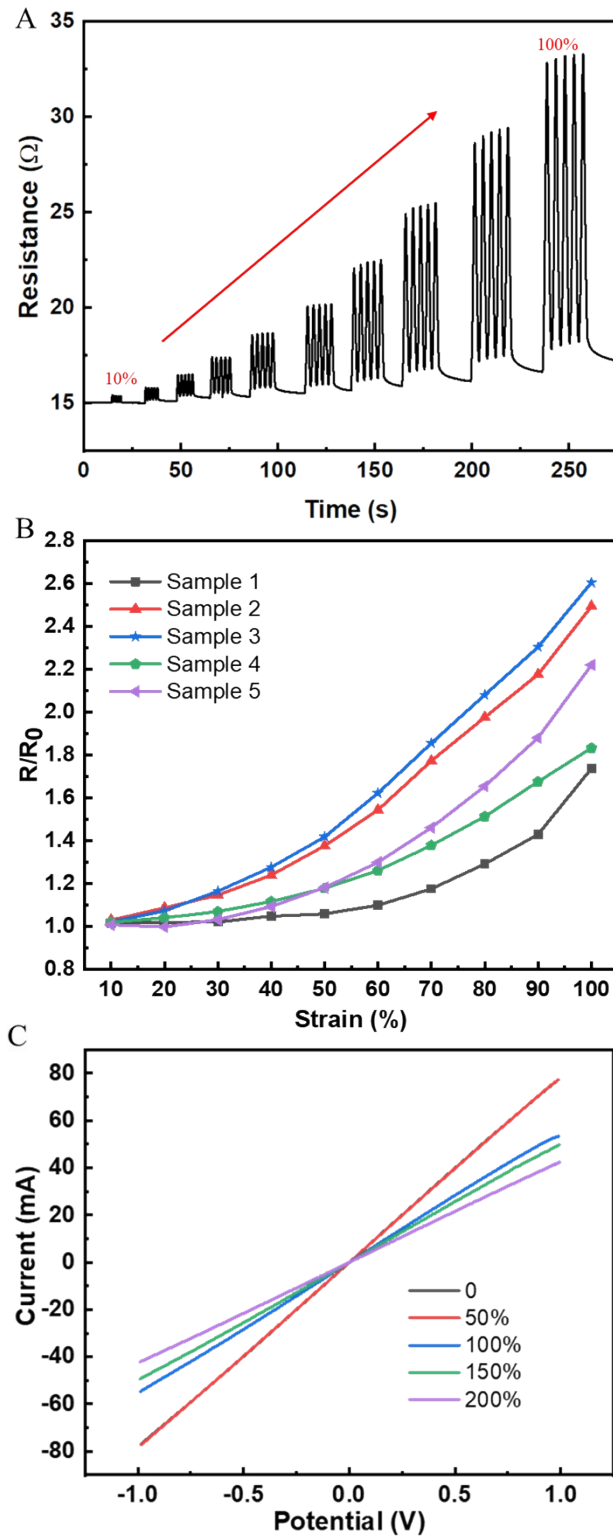

**Figure S7.** (A) Resistance of v-AuNWs sponge/ Ecoflex composite under different strains from 10% strain to 100% strain, each applied strain test 5 cycles. (B) Summary of five v-AuNWs sponge/Ecoflex

composites samples resistance change under different strains from 10% to 100% strain. (C) I-V curves test from one v-AuNWs sponge/Ecoflex composite sample at different strain levels.

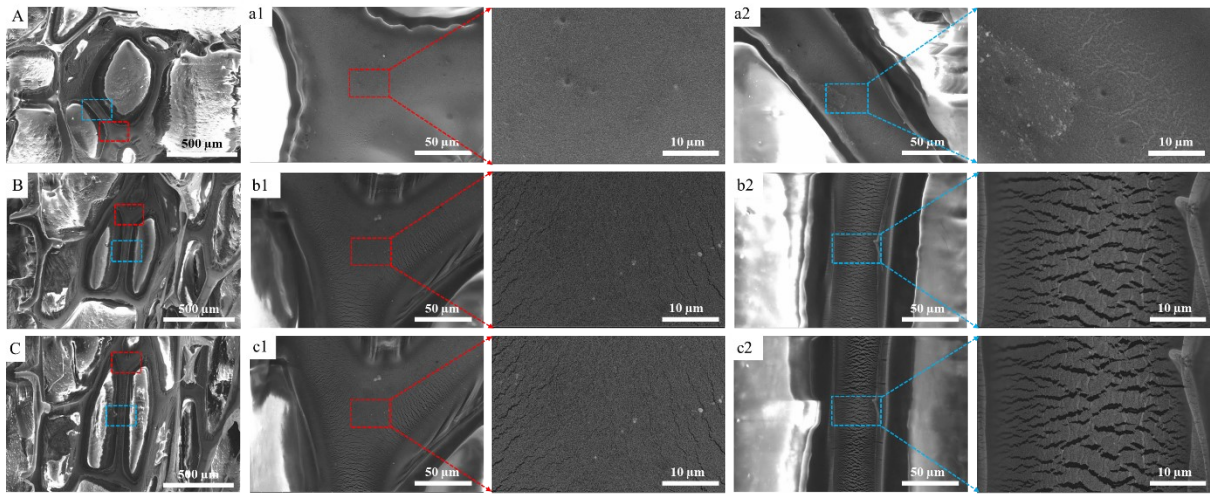

**Figure S8.** SEM images of v-AuNWs sponge/ Ecoflex conductor under no strain (A), 30% strain (B), and 100% strain (C); (a1) and (a2) are the zoom in view of red and blue dashed rectangles in (A) respectively; (b1) and (b2) are the zoom in view of red and blue dashed rectangles in (B) respectively; (c1) and (c2) are the zoom in view of red and blue dashed rectangles in (C) respectively. (B) and (C) are from same sample and almost same areas.

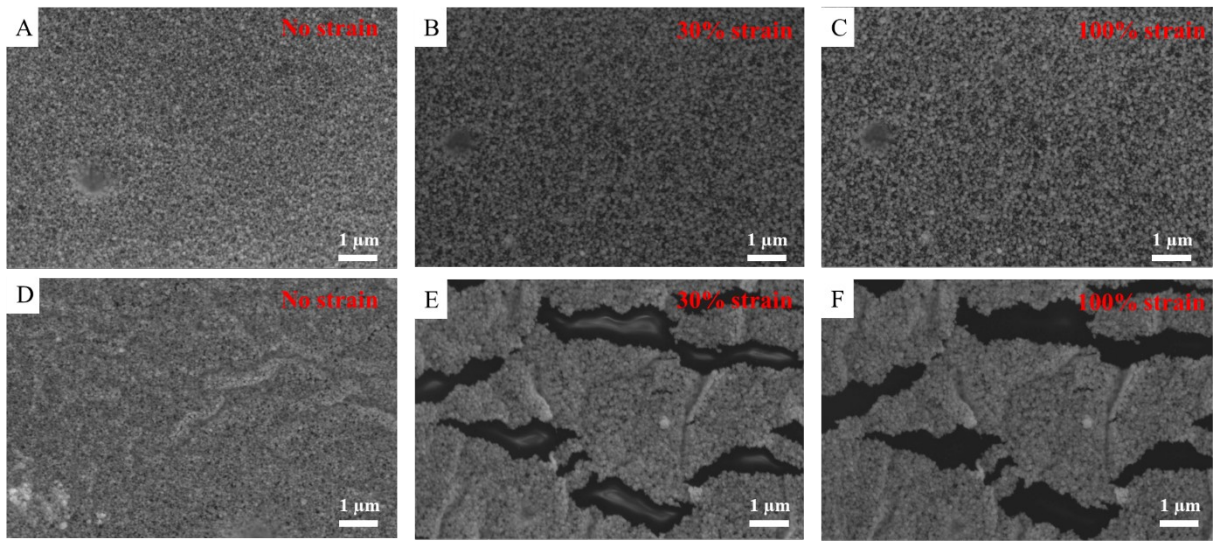

**Figure S9.** (A-F) SEM images of zoom in view of (a1), (b1), (c1), (a2), (b2), (c2) in figure S7 respectively.

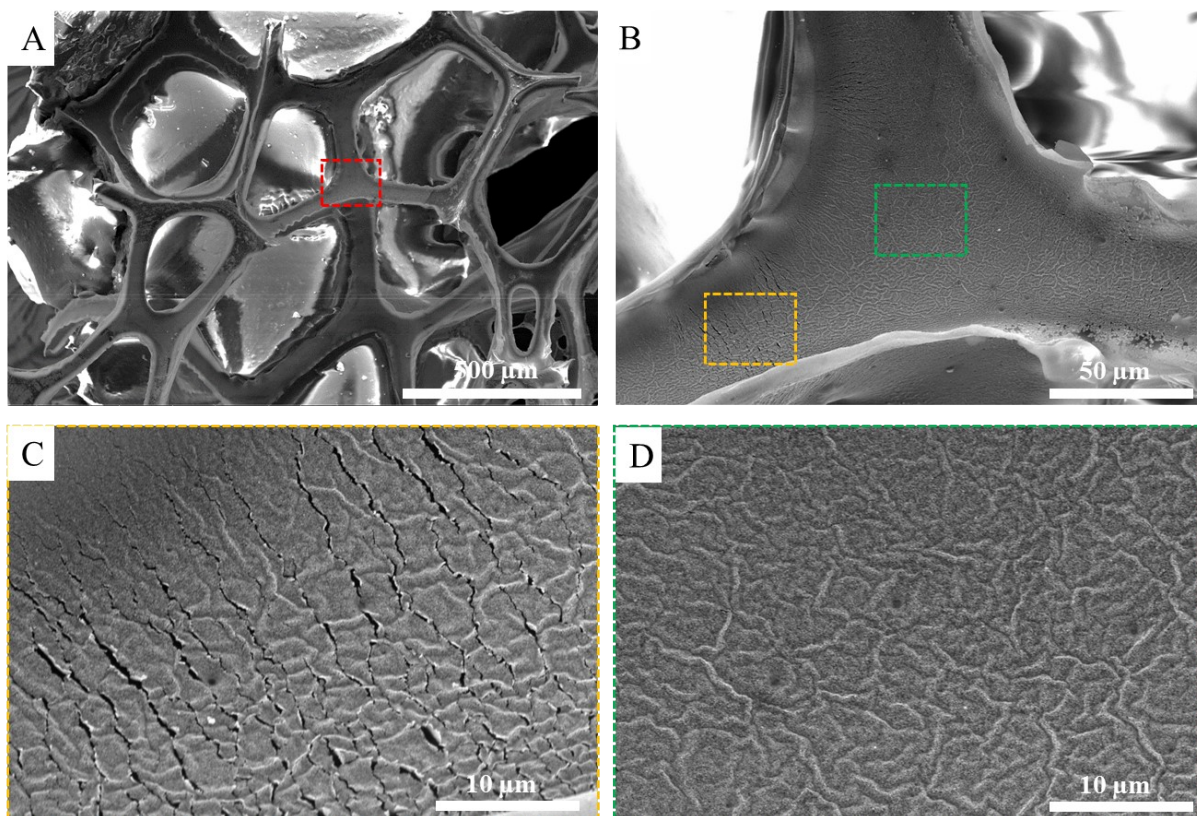

**Figure S10.** SEM images of v-AuNWs sponge/ Ecoflex conductor after 5000 stretching cycles (A); (B) is the zoom in view of red dashed rectangle in (A); (C) and (D) are the zoom in view of yellow and blue dashed rectangles in (B).

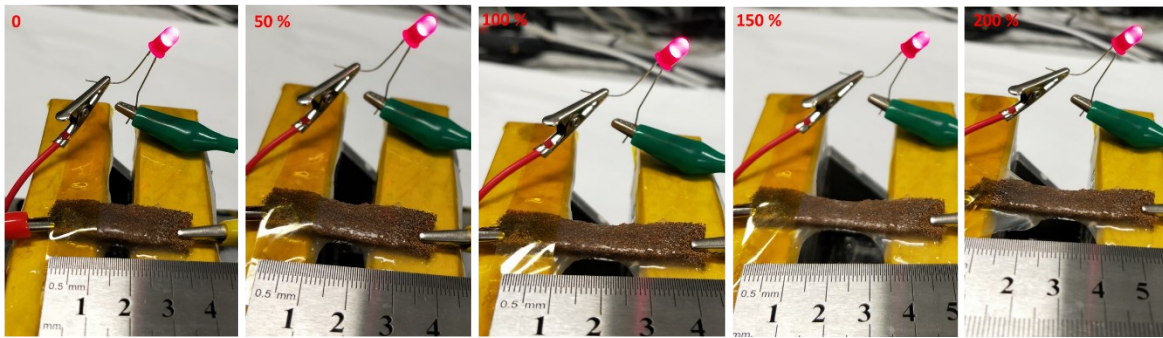

**Figure S11.** Photograph of v-AuNWs sponge/Ecoflex conductor under different strain levels.

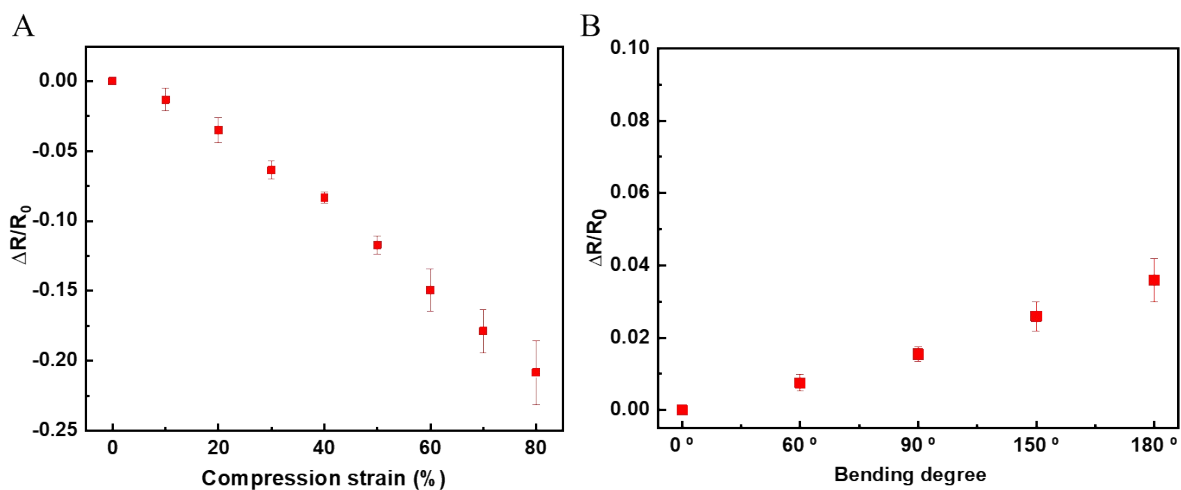

**Figure S12.** (A) The relative resistance change of v-AuNWs sponge under different compression strains. (B) The relative resistance change of v-AuNWs sponge under different bending degrees. Both results obtained from three samples and each sample tested two times. The  $\Delta R/R_0=(R-R_0)/R_0$ , in which the  $R_0$  is the resistance when no external deformation applied to the v-AuNWs sponge, and  $R$  is the resistance when different external deformations applied to the v-AuNWs sponge.

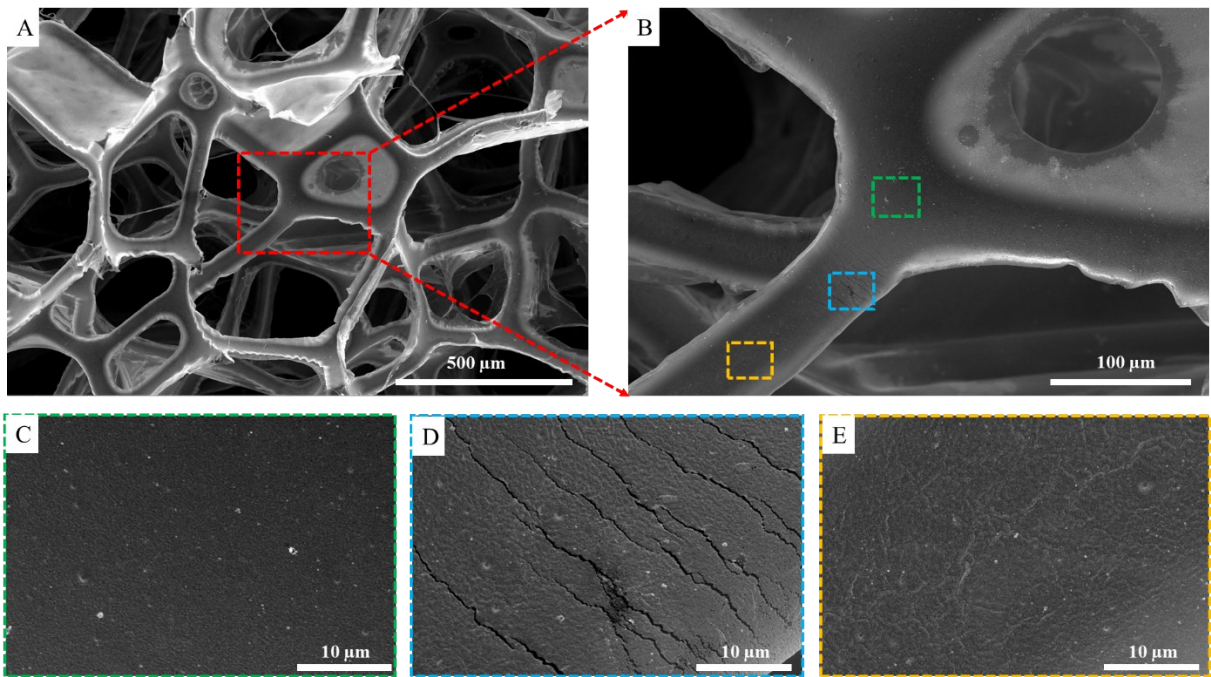

**Figure S13.** (A) SEM images of v-AuNWs sponge without Ecoflex under 50% compression; (B) is the zoom in view of red dashed rectangle in (A); (C), (D) and (E) are the zoom in view of green, blue and yellow dashed rectangles in (B) respectively.



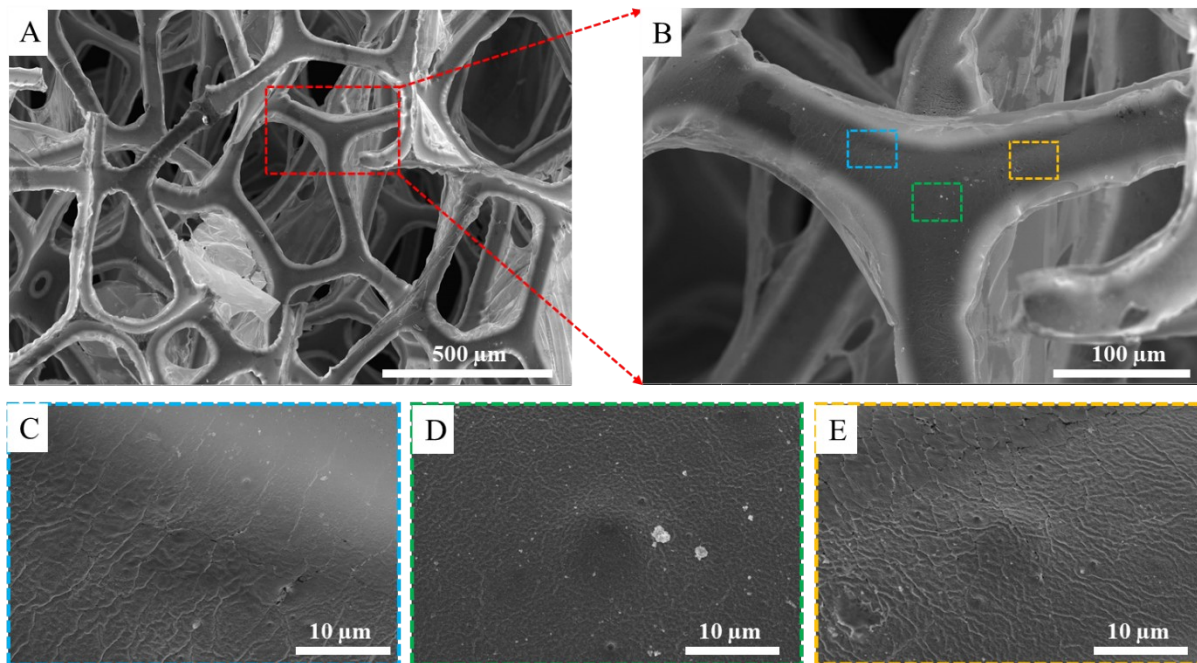

**Figure S14.** (A) SEM images of v-AuNWs sponge without Ecoflex after 50% compression cycles for 20 times; (B) is the zoom in view of red dashed rectangle in (A); (C), (D) and (E) are the zoom in view of blue, green and yellow dashed rectangles in (B) respectively.

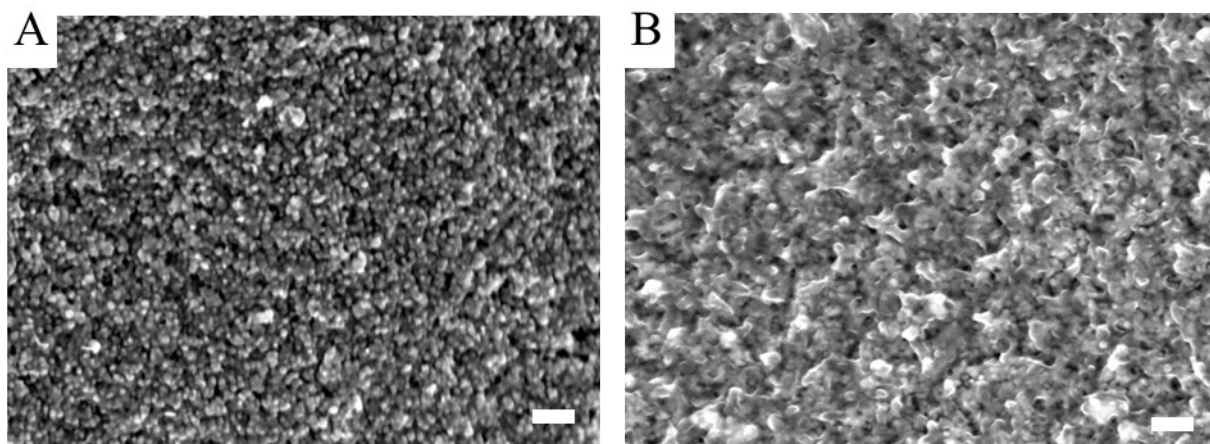

**Figure S15.** SEM images of v-AuNWs sponge before (A) and after (B) PANI deposition, scale bar is 100 nm. Sample for A is v-AuNWs sponge, sample for B is PANI deposited on v-AuNWs sponge.

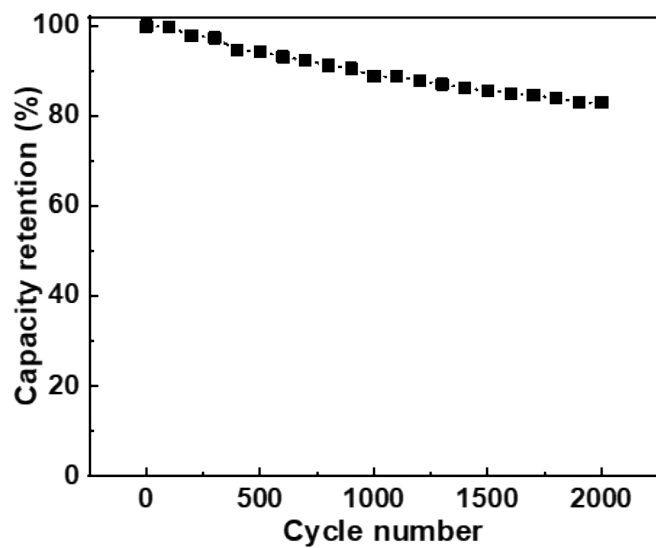

**Figure S16.** Capacitance retention of v-AuNWs/PANI sponge based supercapacitor for 2000 CV cycles under  $200 \text{ mV s}^{-1}$  scan rate.

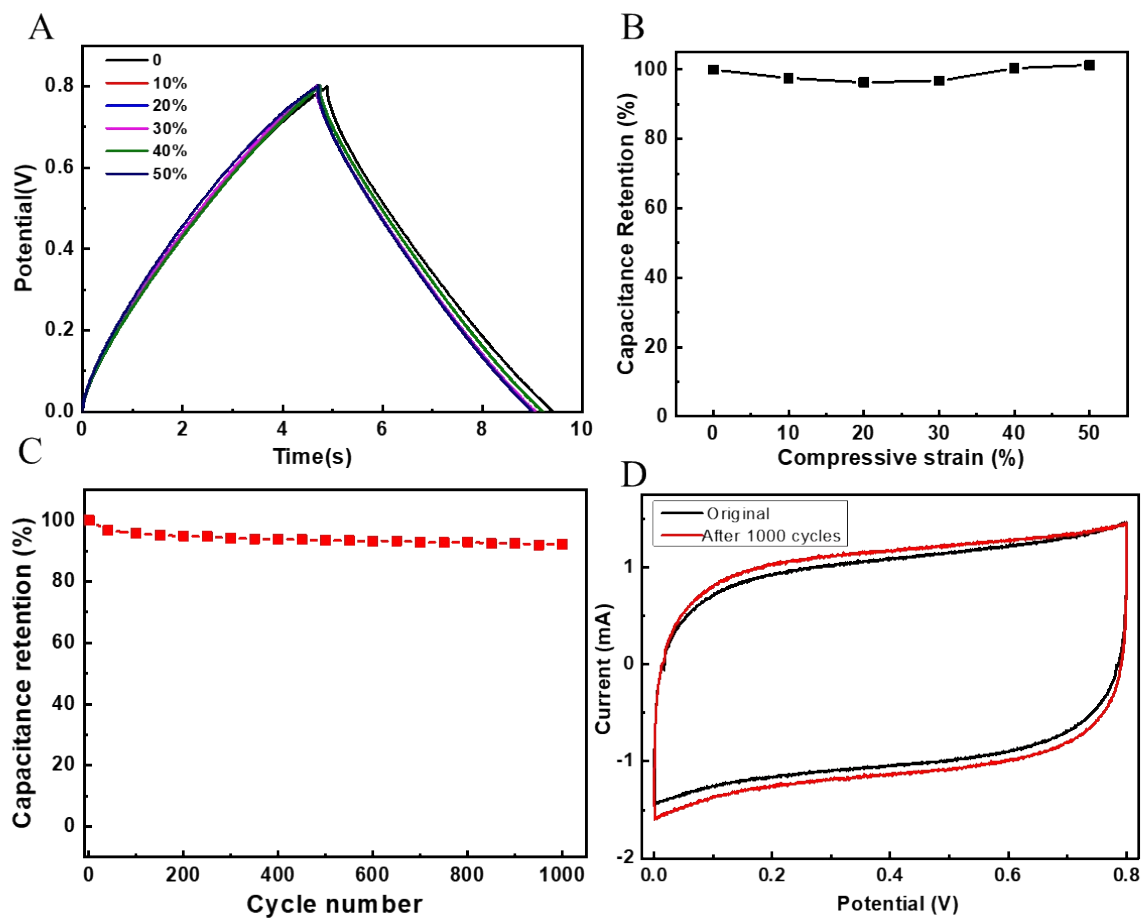

**Figure S17.** (A) GCD curves of v-AuNWs/PANI sponge based supercapacitor under different compression strains. (B) Capacitance retention under different compression strains. (C) Capacitance retention under repeated compressing 50% for 1000 cycles. (D) CV curves under  $200 \text{ mV s}^{-1}$  before and after 1000 compressing tests.

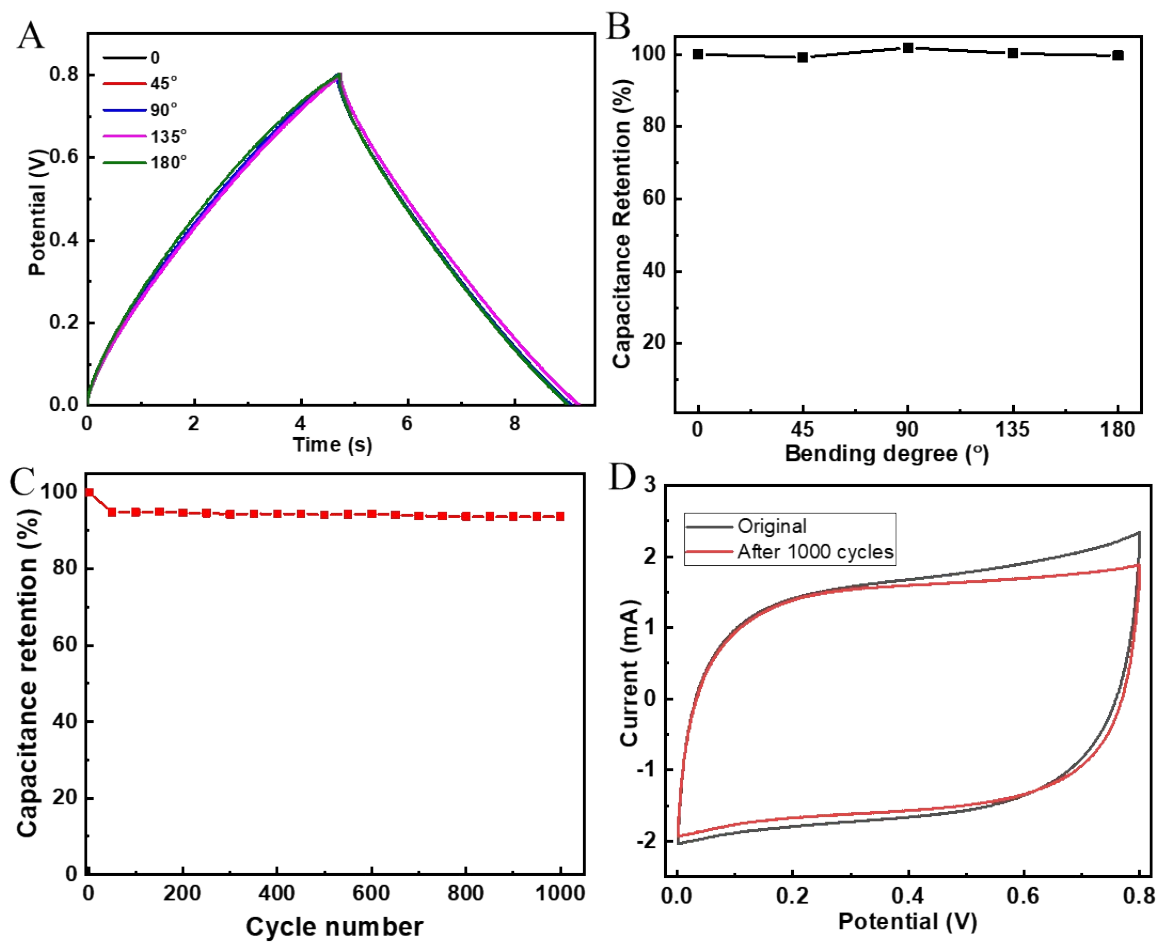

**Figure S18.** (A) GCD curves of v-AuNWs/PANI sponge based supercapacitor under different bending degrees. (B) Capacitance retention under different bending degrees. (C) Capacitance retention under repeated bending to 180° for 1000 cycles. (D) CV curves under 200 mV s<sup>-1</sup> before and after 1000 bending tests.

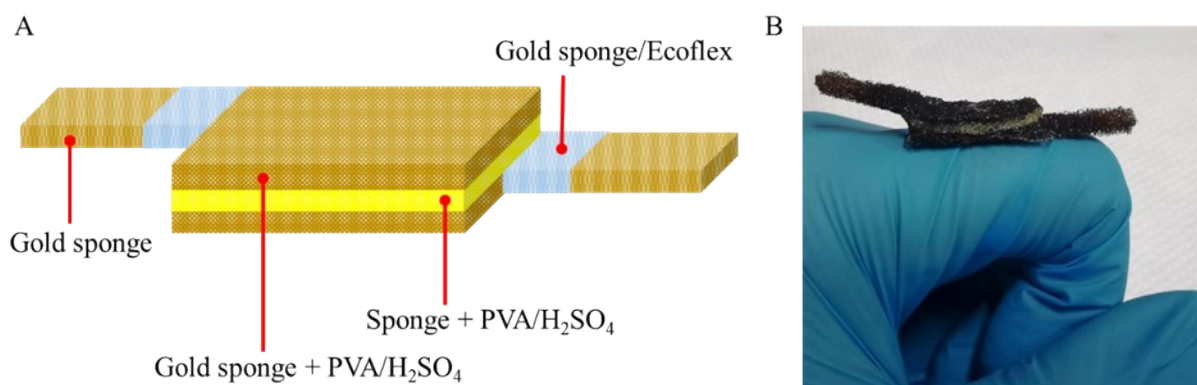

**Figure S19.** (A) Scheme of gold nanowires sponge based fully deformable supercapacitors. (B) Photograph of fully deformable gold nanowires sponge based supercapacitors.

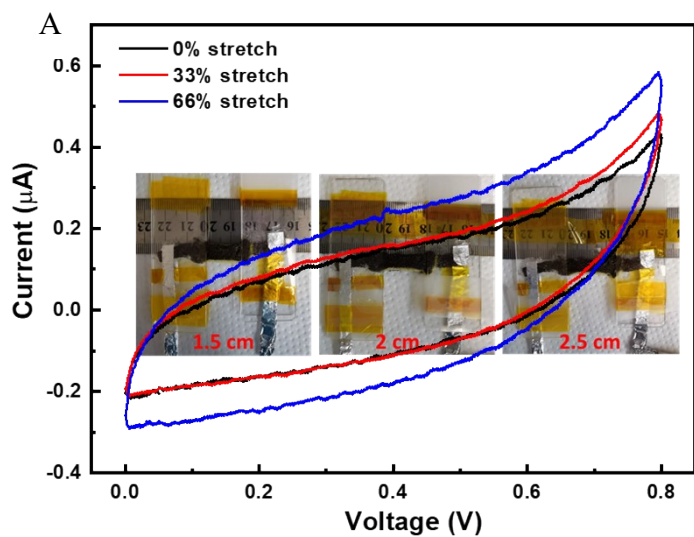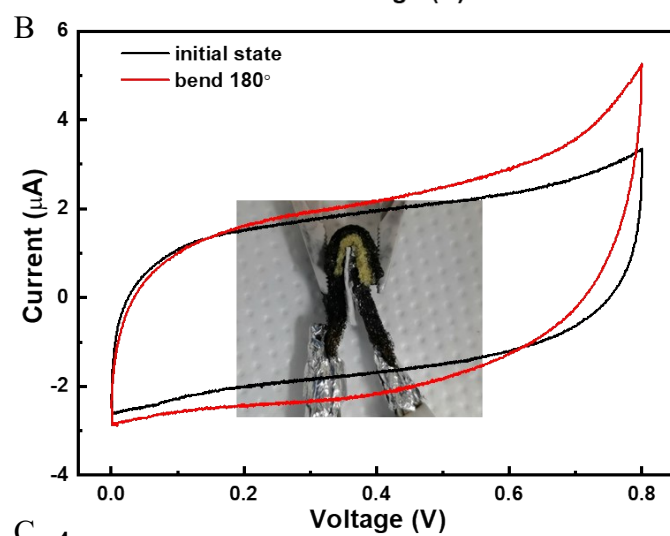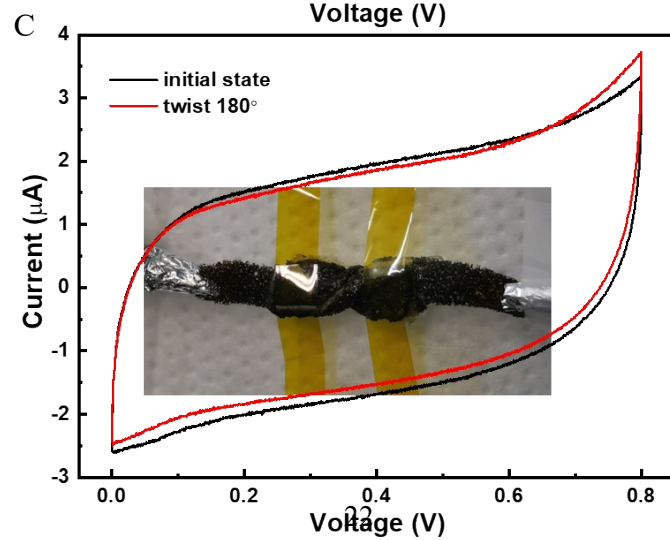

**Figure S20.** Electrochemical performance of fully soft v-AuNWs sponge-based supercapacitors under stretching (A), bending (B), and twisting (C), the insert optical images are v-AuNWs sponge based supercapacitors under stretching, bending, and twisting respectively.

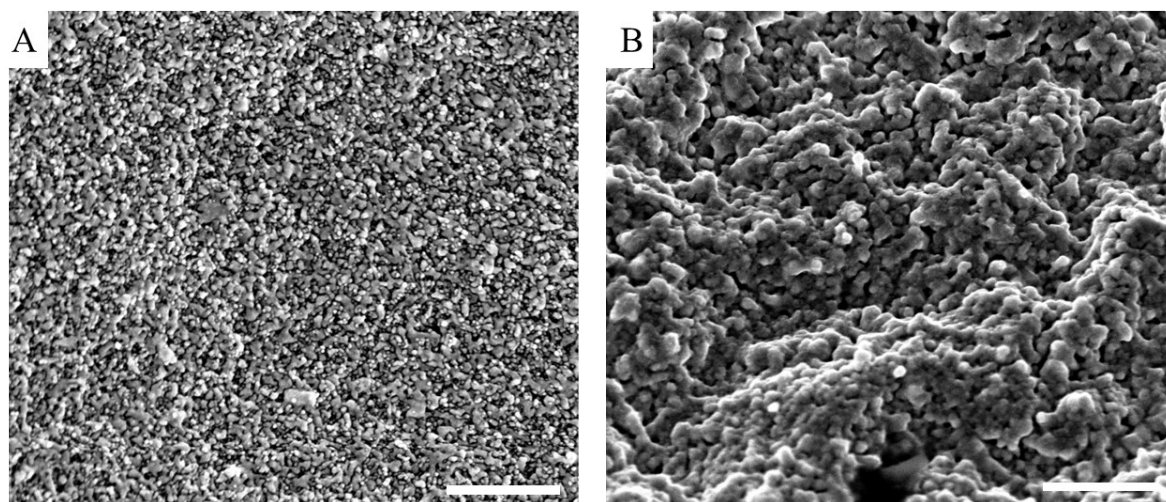

**Figure S21.** SEM image of v-AuNWs sponge before (A) and after (B) catalysis, scale bas is 500 nm. Sample for A is v-AuNWs sponge, sample for B is v-AuNWs sponge after catalysis.

## References

1. Z. Niu, W. Zhou, X. Chen, J. Chen and S. Xie, *Adv. Mater.*, 2015, **27**, 6002-6008.
2. I. K. Moon, S. Yoon and J. Oh, *Adv. Mater. Interfaces*, 2017, **4**, 1700860.
3. Y. Song, H. Chen, Z. Su, X. Chen, L. Miao, J. Zhang, X. Cheng and H. Zhang, *Small*, 2017, **13**, 1702091.
4. X. Liang, K. Nie, X. Ding, L. Dang, J. Sun, F. Shi, H. Xu, R. Jiang, X. He, Z. Liu and Z. Lei, *ACS Appl. Mater. Interfaces*, 2018, **10**, 10087-10095.
5. K. Xiao, L. X. Ding, G. Liu, H. Chen, S. Wang and H. Wang, *Adv. Mater.*, 2016, **28**, 5997-6002.
6. P. Li, Y. Yang, E. Shi, Q. Shen, Y. Shang, S. Wu, J. Wei, K. Wang, H. Zhu, Q. Yuan, A. Cao and D. Wu, *ACS Appl. Mater. Interfaces*, 2014, **6**, 5228-5234.
